# Supplementary material for: Near ultraviolet light excitable highly efficient blue-green multicolour warwickite phosphor, ScCaO(BO3):Ce3+, Tb3+
Source: Royal Society of Chemistry journal article supplement (doi:10.1039/d2ma01065h), 2023-01-01
Supplement: d2ma01065h1.pdf [file d2ma01065h1.pdf]

Electronic Supplementary Information (ESI);

**Near Ultraviolet Light Excitable Highly Efficient Blue-Green Multicolour  
Warwickite Phosphor,  $\text{ScCaO}(\text{BO}_3)\text{:Ce}^{3+}, \text{Tb}^{3+}$**

Masato Iwaki<sup>a,\*</sup>, Haruto Sato<sup>a</sup>, Mizuki Watanabe<sup>a,\*</sup>, Kazuyoshi Uematsu<sup>b</sup>, Mineo  
Sato<sup>b</sup> and Kenji Toda<sup>a,\*</sup>

<sup>a</sup> Graduate School of Science and Technology, Niigata University, 8050 Ikarashi  
2-nocho, Niigata 950-2181, Japan.

<sup>b</sup> Department of Chemistry and Chemical Engineering, Faculty of Engineering,  
Niigata University, 8050 Ikarashi 2-nocho, Niigata 950-2181, Japan

Corresponding author

\* Masato Iwaki

E-mail: f20k003j@mail.cc.niigata-u.ac.jp

\* Dr. Mizuki Watanabe

E-mail: mwatanabe@eng.niigata-u.ac.jp

## Contents;

1 Rietveld refinement for  $\text{ScCaO}(\text{BO}_3):0.01\text{Ce}^{3+}, y\text{Tb}^{3+}$  ( $y = 0, 0.01, 0.50, 0.10, 0.15$  and  $0.20$ ). Observed (black cross symbol) and calculated (red) and difference (blue) were obtained from Rietveld refinement on X-ray powder diffraction of samples; Fig. S1

2 Lattice parameters and R-values obtained from the Rietveld refinement for  $\text{ScCaO}(\text{BO}_3):0.01\text{Ce}^{3+}, y\text{Tb}^{3+}$  ( $y = 0, 0.01, 0.05, 0.10, 0.15, 0.20$ ); Table S1

3 Peak deconvolution of the emission band for 1 mol%  $\text{Ce}^{3+}$ -activated SCBO phosphor with two components; Fig. S2

4 Results of the peak deconvolution in  $\text{ScCaO}(\text{BO}_3):0.01\text{Ce}^{3+}$ ; Table S2

5 Optical energy diagram of the  $\text{Ce}^{3+}$  ion occupied on  $\text{CaO}_6$  octahedral sites in the SCBO host.  $\varepsilon_c$ ,  $\varepsilon_{cfs}$  and  $\Delta S$  represent centroid shift, crystal field splitting and stokes shift, respectively; Fig. S3.

6 Results of Absolute quantum efficiencies measurement for  $\text{ScCaO}(\text{BO}_3):0.01\text{Ce}^{3+}$  and  $\text{CaScO}(\text{BO}_3):0.01\text{Ce}^{3+}, 0.15\text{Tb}^{3+}$  phosphors; Table S3.

7 Dependence of Energy transfer efficiency on concentration of  $\text{Tb}^{3+}$  ion; Fig. S4.

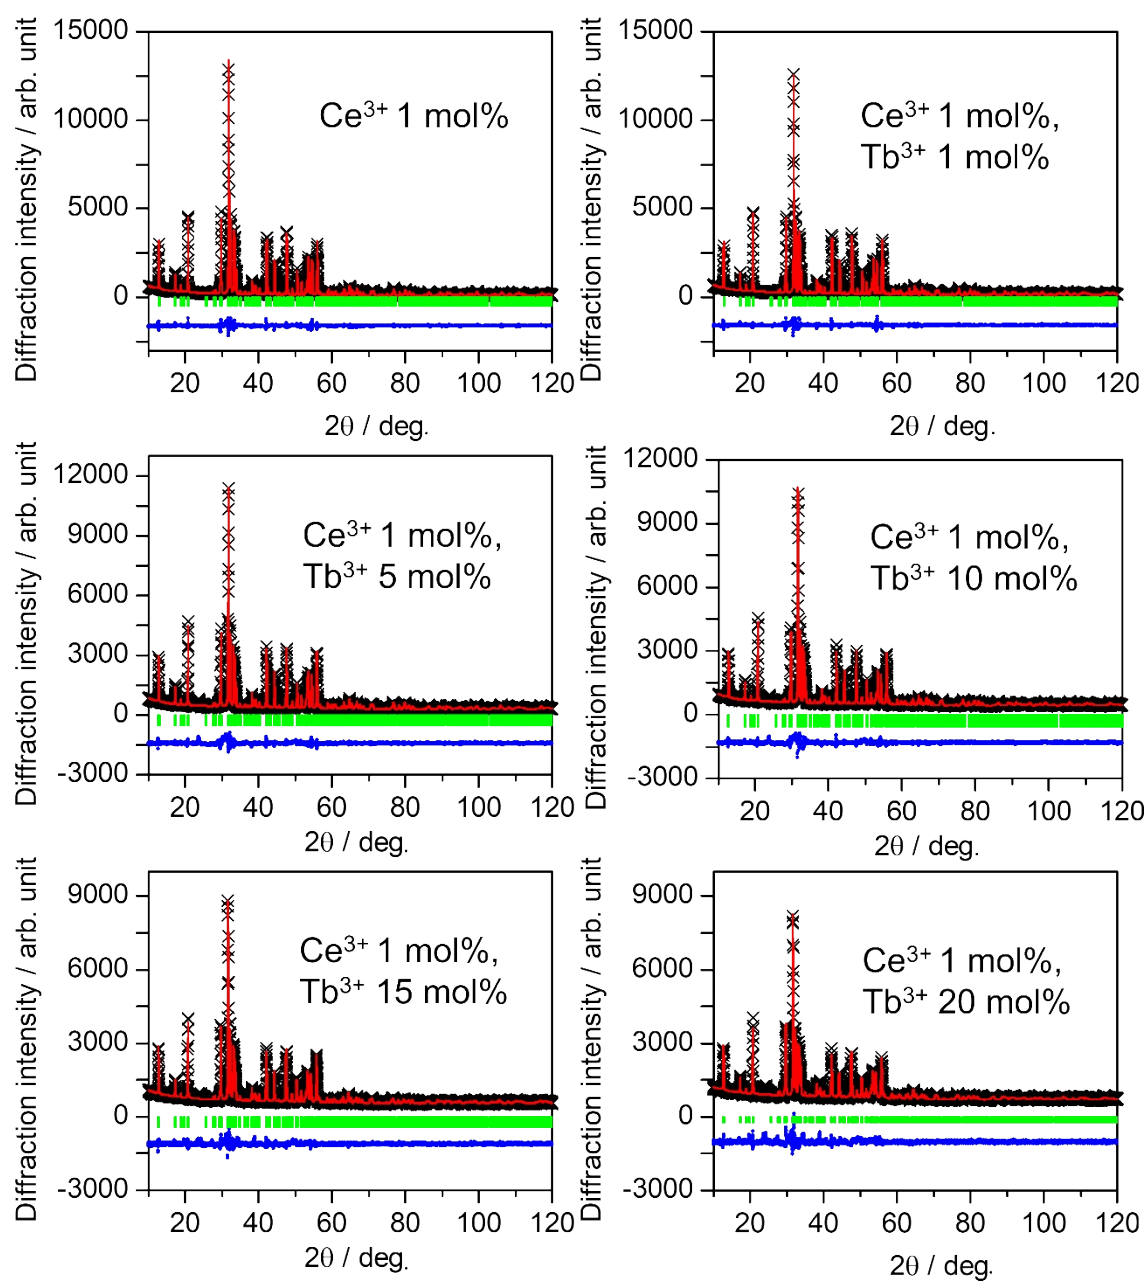

Figure S1 Rietveld refinement for  $\text{ScCaO}(\text{BO}_3):0.01\text{Ce}^{3+}, y\text{Tb}^{3+}$  ( $y = 0, 0.01, 0.50, 0.10, 0.15$

and 0.20). Observed (black cross symbol) and calculated (red) and difference (blue) were

obtained from Rietveld refinement on X-ray powder diffraction of samples.

Table S1 Lattice parameters and R-values obtained from the Rietveld refinement for

ScCaO(BO<sub>3</sub>):0.01Ce<sup>3+</sup>, yTb<sup>3+</sup> (y = 0, 0.01, 0.05, 0.10, 0.15, 0.20).

| CaScO(BO <sub>3</sub> ):0.01Ce <sup>3+</sup> , yTb <sup>3+</sup> |                      |            |            |            |            |           |
|------------------------------------------------------------------|----------------------|------------|------------|------------|------------|-----------|
|                                                                  | y = 0                | y = 0.01   | y = 0.05   | y = 0.10   | y = 0.15   | y = 0.20  |
| System                                                           | Orthorhombic         |            |            |            |            |           |
| S. G.*                                                           | <i>Pnma</i> (No. 62) |            |            |            |            |           |
| a [Å]                                                            | 10.2601(3)           | 10.2690(3) | 10.2702(6) | 10.2740(6) | 10.2754(7) | 10.276(1) |
| b [Å]                                                            | 3.36513(9)           | 3.3664(1)  | 3.3694(2)  | 3.3783(2)  | 3.3826(2)  | 3.3856(3) |
| c [Å]                                                            | 9.4174(3)            | 9.4187(3)  | 9.4199(5)  | 9.4298(5)  | 9.4313(6)  | 9.4334(9) |
| V [Å <sup>3</sup> ]                                              | 325.15(2)            | 325.60(2)  | 325.97(3)  | 327.29(3)  | 327.81(4)  | 328.18    |
| Z [-]                                                            | 4                    |            |            |            |            |           |
| R <sub>wp</sub> [%]                                              | 9.408                | 8.415      | 8.551      | 6.811      | 6.100      | 6.432     |
| R <sub>p</sub> [%]                                               | 6.832                | 6.203      | 5.865      | 4.753      | 4.357      | 4.412     |
| R <sub>e</sub> [%]                                               | 5.624                | 5.286      | 4.449      | 3.930      | 3.661      | 3.309     |
| S [-]                                                            | 1.6726               | 1.592      | 1.9221     | 1.733      | 1.666      | 1.944     |

\*S. G. means Space Group

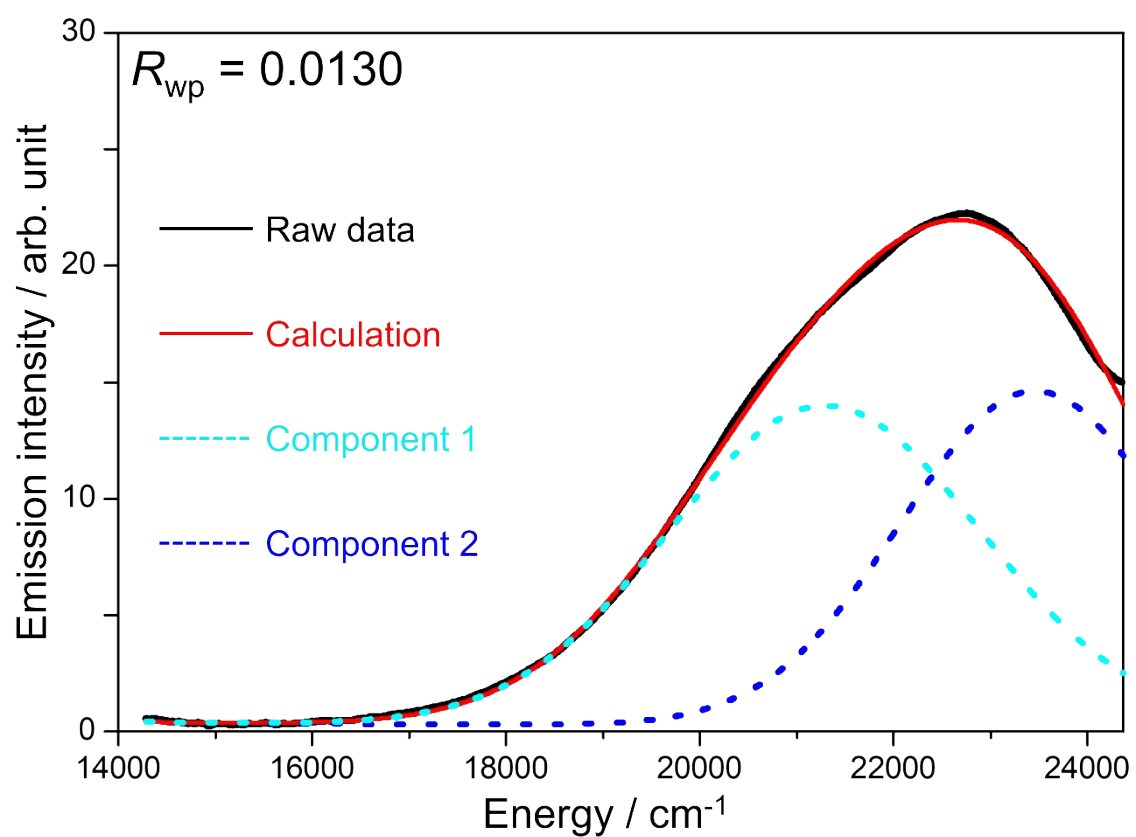

Figure S2 Peak deconvolution of the emission band for 1 mol% Ce<sup>3+</sup>-activated SCBO phosphor with two components.

Table S2 Results of the peak deconvolution in  $\text{ScCaO}(\text{BO}_3):0.01\text{Ce}^{3+}$ .

| Component 1 [ $\text{cm}^{-1}$ ] | Component 2 [ $\text{cm}^{-1}$ ] | Energy gap [ $\text{cm}^{-1}$ ] |
|----------------------------------|----------------------------------|---------------------------------|
| 21,290                           | 23,459                           | 2,169                           |

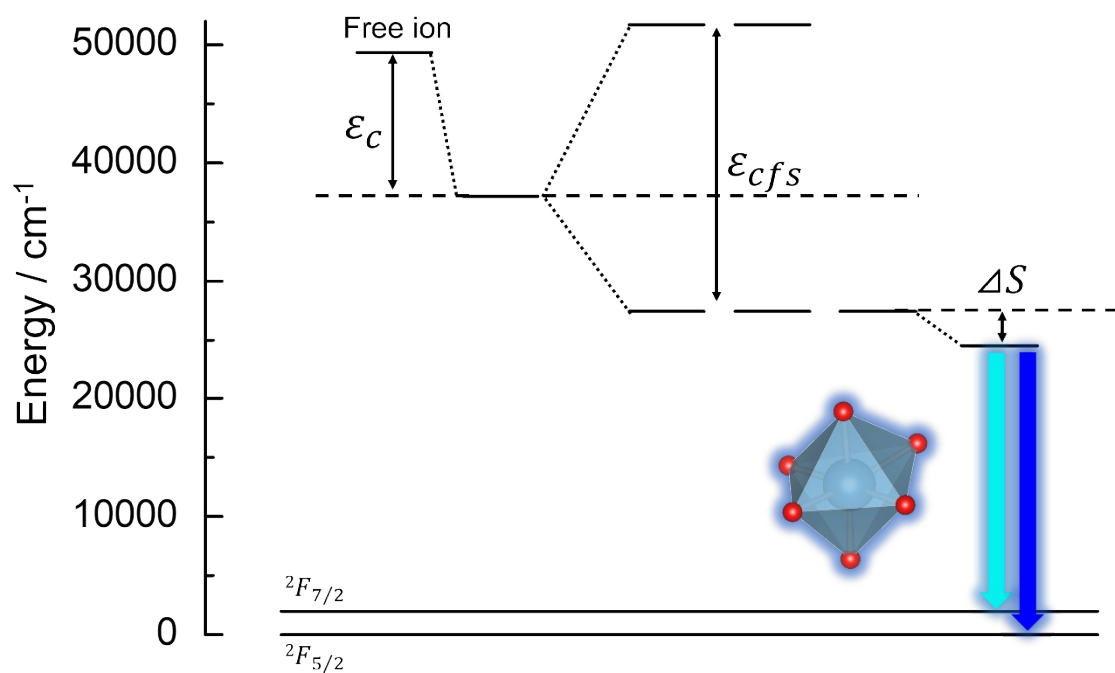

Figure S3 Optical energy diagram of the  $\text{Ce}^{3+}$  ion occupied on  $\text{CaO}_6$  octahedral sites in the SCBO host.  $\epsilon_c$ ,  $\epsilon_{cfs}$  and  $\Delta S$  represent centroid shift, crystal field splitting and stokes shift, respectively.

Table S3 Results of Absolute quantum efficiencies measurement for ScCaO(BO<sub>3</sub>):0.01Ce<sup>3+</sup> and CaScO(BO<sub>3</sub>):0.01Ce<sup>3+</sup>, 0.15Tb<sup>3+</sup> phosphors.

| Sample                                      | Abs. [%] | EQE [%] | IQE [%] |
|---------------------------------------------|----------|---------|---------|
| 0.01Ce <sup>3+</sup>                        | 23.685   | 20.053  | 84.666  |
| 0.01Ce <sup>3+</sup> ,0.15 Tb <sup>3+</sup> | 27.065   | 16.801  | 62.076  |



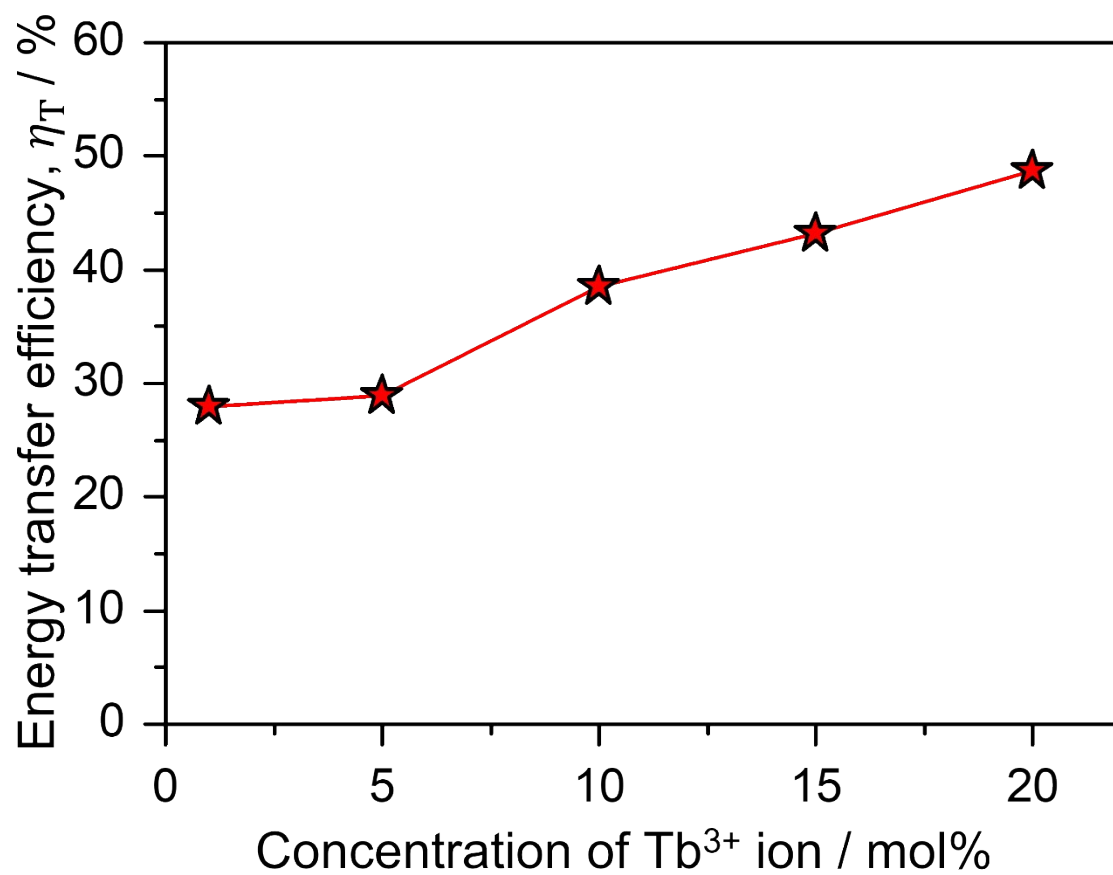

Figure S4 Dependence of Energy transfer efficiency on concentration of  $\text{Tb}^{3+}$

ion.
